# Supplementary material for: Effects of Table Grape Cultivars on Fruit Quality and Aroma Components
Source: MDPI journal article supplement (doi:10.3390/foods12183371), 2023-09-08
Supplement: s1 [file s1]

**Table S1 Introduction of tested grape varieties**

| Number | Name of species        | Type of species          | Location of test field | Sampling time | color |
|--------|------------------------|--------------------------|------------------------|---------------|-------|
| A      | <i>Heibaladuo</i>      | <i>Vitis vinifera</i> L. | B-24-S15               | 2021.8.1      | red   |
| B      | <i>Meixiangbao</i>     | Franco-american          | B-22-S15               | 2021.8.4      | red   |
| C      | <i>Italy</i>           | <i>Vitis vinifera</i> L. | B-3, 4                 | 2021.8.6      | white |
| D      | <i>Sunmmmer Black</i>  | Franco-american          | B-25-M16               | 2021.8.7      | red   |
| E      | <i>Shaoxing 1 hao</i>  | <i>Vitis vinifera</i> L. | B-20-N16               | 2021.8.8      | red   |
| F      | <i>Zaoheibao</i>       | <i>Vitis vinifera</i> L. | B-25-S15               | 2021.8.10     | red   |
| G      | <i>Manicure Finger</i> | <i>Vitis vinifera</i> L. | B-9, 10                | 2021.8.13     | red   |
| H      | <i>Aishenmeigui</i>    | <i>Vitis vinifera</i> L. | B-22-N16               | 2021.8.19     | red   |
| I      | <i>Zhengyanwuhe</i>    | <i>Vitis vinifera</i> L. | B-18-N16               | 2021.8.22     | red   |
| J      | <i>Sweet Sapphire</i>  | <i>Vitis vinifera</i> L. | B-23-S15               | 2021.8.23     | red   |
| K      | <i>Ruby Seedless</i>   | <i>Vitis vinifera</i> L. | B-19-M16               | 2021.8.28     | red   |
| L      | <i>Ruiduwuheyi</i>     | <i>Vitis vinifera</i> L. | B-18-S15               | 2021.8.29     | red   |
| M      | <i>Jumeigui</i>        | Franco-american          | B-1, 2                 | 2021.9.7      | red   |
| N      | <i>Shine-Muscat</i>    | Franco-american          | B-7, 8                 | 2021.9.16     | white |
| O      | <i>Hutai 8 hao</i>     | Franco-american          | B-11, 12               | 2021.9.16     | red   |
| P      | <i>Heisetiancai</i>    | Franco-american          | B-25-N16               | 2021.9.22     | red   |
| Q      | <i>Zitianwuhe</i>      | <i>Vitis vinifera</i> L. | B-22-M16               | 2021.9.24     | red   |

Table S2 Sensory evaluation criteria for table grapes

| Project (100)   |                                                                                                                                         | Scoring Range | Score |
|-----------------|-----------------------------------------------------------------------------------------------------------------------------------------|---------------|-------|
| Appearance (30) | Ear drop, loose, stem withered, poor fruit shape, fruit wilt,<br>juice overflow, no fruit powder                                        | 1-10          |       |
|                 | The ear was compact and moderate, the peduncles were<br>brown, the fruit color was dark, and the fruit powder dropped<br>off a little   | 10-20         |       |
|                 | The ear is compact, the stem is fresh and tender, the fruit<br>shape is correct, the fruit color is bright, the fruit powder is<br>full | 20-30         |       |
|                 |                                                                                                                                         |               |       |
| Texture (30)    | The pericarp is rough, the pulp is soft, and the pulp and<br>pericarp are separated in bags                                             | 1-10          |       |
|                 | The skin is not tough enough, and the flesh is soft and brittle                                                                         | 10-20         |       |
|                 | The skin is puffed and cracked easily, and the flesh is thick,<br>juicy and rich in texture                                             | 20-30         |       |
| Flavor (40)     | The flavor is uncoordinated, the acidity is too big, the<br>astringent taste is slightly heavy, has the bad smell                       | 1-15          |       |
|                 | Good flavor, less sweet, no bad smell                                                                                                   | 15-30         |       |
|                 | Excellent flavor, harmonious sugar-acid ratio, grape-specific<br>aroma rich                                                             | 30-40         |       |
